1 **Androgen responsiveness to simulated territorial intrusions in *Allobates femoralis***  
2 **males: evidence supporting the challenge hypothesis in a territorial frog**

3

4 Camilo Rodríguez<sup>1,†</sup>, Leonida Fusani<sup>1,2</sup>, Gaëlle Raboisson<sup>1</sup>, Walter Hödl<sup>1</sup>, Eva Ringler<sup>1,3,4</sup>  
5 and Virginie Canoine<sup>1</sup>

6

7 <sup>1</sup> Department of Behavioral and Cognitive Biology, University of Vienna, Vienna, Austria.

8 <sup>2</sup> Konrad Lorenz Institute of Ethology, University of Veterinary Medicine, Vienna, Austria.

9 <sup>3</sup> Messerli Research Institute, University of Veterinary Medicine Vienna, Medical University  
10 Vienna, University of Vienna, Vienna, Austria.

11 <sup>4</sup> Division of Behavioural Ecology, Institute of Ecology and Evolution, University of Bern,  
12 Bern, Switzerland.

13 <sup>†</sup> Corresponding author. E-mail: [camilo.rodriguez@univie.ac.at](mailto:camilo.rodriguez@univie.ac.at)

14

15 **Abstract**

16 Territorial behaviour has been widely described across many animal taxa, where the  
17 acquisition and defence of a territory are critical for the fitness of an individual. Extensive  
18 evidence suggests that androgens (e.g. testosterone) are involved in the modulation of  
19 territorial behaviour in male vertebrates. Short-term increase of androgen following a  
20 territorial encounter appears to favour the outcome of a challenge. The “Challenge  
21 Hypothesis” proposed by Wingfield and colleagues outlines the existence of a positive  
22 feedback relationship between androgen and social challenges (e.g. territorial intrusions) in  
23 male vertebrates. Here we tested the challenge hypothesis in the highly territorial poison frog,  
24 *Allobates femoralis*, in its natural habitat by exposing males to simulated territorial intrusions  
25 in form of acoustic playbacks. We quantified repeatedly androgen concentrations of

26 individual males via a non-invasive water-borne sampling approach. Our results show that *A.*  
27 *femorialis* males exhibited a positive behavioural and androgenic response after being  
28 confronted to simulated territorial intrusions, providing support for the Challenge Hypothesis  
29 in a territorial frog.

30

31 **Key words:** Water-borne androgen, Challenge Hypothesis, poison frog, Androgens,  
32 Simulated territorial intrusion.

33

## 34 **1. Introduction**

35 Territoriality is a widespread behaviour across many animal taxa and provides  
36 the territory holder with primary access to critical resources for individual fitness such  
37 as food, shelter, breeding sites and space for mating. In many species, only males  
38 engage in competitive interactions and contests with their conspecifics for the  
39 acquisition of territories (Davies, 1991). There is extensive evidence that androgens  
40 are involved in the modulation of typical territorial behaviours such as advertisement  
41 signalling and agonistic encounters in male vertebrates (Adkins-Regan, 2005).

42 Testosterone is the main circulating androgen in most male vertebrates and, besides  
43 modulating the expression of primary sexual traits, its main function related to  
44 territoriality is to prepare males for social interactions, like male-male competition  
45 and agonistic encounters (Wingfield et al., 2006).

46

47 In most species with a seasonal breeding pattern, androgen levels undergo a  
48 seasonal fluctuation being higher during territory establishment and during the  
49 reproductive season. On the other hand, species with prolonged breeding and year-  
50 round territoriality present typical low androgen-baseline concentrations along the

51 year but can facultatively rise during heightened male-male competition (i.e.  
52 territorial aggression towards intruders; Wingfield et al., 2006). The “Challenge  
53 Hypothesis” outlines brief increases of androgen levels in response to social  
54 challenges (i.e. territorial intrusions) in male vertebrates (Wingfield and Wada, 1989;  
55 Wingfield et al., 1990). This rapid increase in androgen levels promote  
56 aggressiveness, resource defence and mate guarding in a male-male competition  
57 context. Originally proposed for birds (Wingfield et al., 1990), the Challenge  
58 Hypothesis has been experimentally tested in fish, amphibians, non-avian reptiles and  
59 mammals (reviewed by Moore et al., 2019) by simulating a territorial intrusion (STI)  
60 test. These tests typically consist in presenting a stuffed or alive conspecific male  
61 decoy to a territorial male, combined /or solely with a conspecific acoustic stimulus,  
62 in order to quantify its aggressive response to this “intruder”. Results in different taxa  
63 were not consistent and had sometimes contrasting outcomes, prompting for a wider  
64 research across vertebrate taxa with a diverse suite of life-histories regulated by  
65 androgens (reviewed by Moore et al., 2019). For instance, tropical amphibians  
66 provide ideal models for exploring the challenge hypothesis since they exhibit a  
67 multitude of strategies allegedly modulated by androgens such as parental care, sexual  
68 advertisement and/or territorial defence (Moore et al., 2005). So far, the few studies  
69 that investigated the challenge hypothesis in amphibians yielded contrasting results.  
70 For instance, in males of the Smith frog (*Hypsiboas faber*) testosterone levels did not  
71 increase after challenging males with STIs (de Assis et al., 2012). Otherwise, in the  
72 túngara frog (*Engystomops pustulosus*), water-borne testosterone concentration  
73 increased after confronting males to a combined acoustic and chemical (excretions of  
74 calling males) stimulus simulating a male competitor (Still et al., 2019).

75

76                   Almost all male Neotropical poison frogs (Dendrobatidae) have been found to  
77 exhibit pronounced territoriality, showing aggressive territorial defence towards  
78 conspecifics (Pröhl, 2005). To date, it is not clear whether male territoriality in poison  
79 frogs is modulated by androgens. Part of this uncertainty is due to limitations in the  
80 collection of tissue for hormone measurement in small anurans. Classical hormone  
81 measurement methods are based on blood samples (Narayan, 2013) because  
82 hormones are systemic signals primarily released into the blood stream from the  
83 endocrine system. However, blood sampling may be difficult in small animals  
84 because of the amount of plasma needed for hormone quantification. Additionally,  
85 blood sampling usually requires prolonged handling of animals and invasive sampling  
86 procedures, which can influence the hormonal response and therefore affect the  
87 interpretation of the results obtained in experiments (Fusani et al., 2005; Hau and  
88 Goymann, 2015; Romero and Reed, 2005). Recently, water-borne sampling has been  
89 validated for measuring multiple steroid hormones from a single water sample (Baugh  
90 and Gray-Gaillard, 2020; Baugh et al., 2018; Gabor et al., 2016, 2013). By reflecting  
91 plasma steroid concentrations through its metabolic products, water-borne sampling  
92 has become an advantageous and non-invasive technique that minimizes the stress to  
93 the animals and allows the researcher to repeatedly measure hormone levels in the  
94 same individuals.

95  
96                   In this study, we tested the effect of territorial challenges on the behavioural  
97 and androgenic response of the Brilliant-thighed poison frog, *Allobates femoralis*.  
98 This species has become a model system for the study of acoustic communication  
99 (Amézquita et al., 2006, 2005; Gasser et al., 2009; Rodríguez and Hödl, 2020), spatial  
100 navigation (Pašukonis et al., 2016, 2014a, 2014b, 2013) reproductive (Ringler et al.,

101 2018; Stückler et al., 2019; Ursprung et al., 2011) and social behaviour (Narins et al.,  
102 2003; Ringler et al., 2017; Rodríguez et al., 2020; Tumulty et al., 2018) in poison  
103 frogs. Males vocally advertise and actively defend their territories to conspecific  
104 males (Hödl, 1983; Narins et al., 2003; Ringler et al., 2011; Roithmair, 1992). No  
105 previous research has explored the proximate mechanisms underlying territorial  
106 behaviour and social interactions in *A. femoralis*, but it is likely that androgens (i.e.  
107 testosterone) modulate its calling and territorial behaviour as this appears to be an  
108 evolutionary conserved mechanism across vertebrate taxa (Simon and Lu, 2006;  
109 Wingfield et al., 2006).

110

111 In order to investigate whether a territorial intrusion induces an increase in  
112 androgens levels of *Allobates femoralis* males (as expected following the Challenge  
113 Hypothesis), we challenged territorial males performing STI-tests by presenting a  
114 playback stimulus. This method has been successfully used to induce a territorial  
115 response (i.e. positive phonotaxis) in *A. femoralis* males (Narins et al., 2006;  
116 Ursprung et al., 2009). Additionally, we measured males' pre- and post-challenge  
117 androgen concentrations from water samples. Prior to analysis, we carried out a series  
118 of laboratory tests to investigate if hormonal concentrations in the holding water  
119 relate to those in the blood. Since there might be effects of time of the day and  
120 spontaneous behaviours on androgens concentration (Wada, 1986), we measured  
121 calling, locomotor, courtship and foraging activity across the day in addition to water-  
122 borne androgen levels prior to the territorial challenge. We further examined whether  
123 the intensity of the behavioural response was coupled with the androgen response to  
124 STIs.

125

126 **2. Methods**

127

128 *2.1. Study system*

129 The brilliant-thighed poison frog, *Allobates femoralis*, is a diurnal and  
130 terrestrial species belonging to the family Dendrobatidae (“AmphibiaWeb,” 2020;  
131 Boulenger, 1883). Males exhibit strong territoriality within the prolonged breeding  
132 season, which usually begins with the onset of the rainy season (Kaefer et al., 2012;  
133 Montanarin et al., 2011). During territorial interactions or courtship displays, males  
134 produce acoustic signals from elevated structures on the forest ground. Courtship  
135 behaviour is accompanied by a locomotor display called “courtship march”, which  
136 usually starts in the afternoon and ends on the next morning (Hödl, 1983; Ringler et  
137 al., 2013; Roithmair, 1992; Stückler et al., 2019). Males’ territorial displays consist,  
138 first, in antiphonal calling to warn neighbouring males of the ownership of a territory,  
139 and second, in a phonotactic or agonistic response towards intruder males (Hödl,  
140 1983; Narins et al., 2003; Roithmair). Vocal behaviour of *A. femoralis* males is more  
141 frequent in the afternoon than in the morning (Roithmair, 1992).

142

143 *2.2. Sample collection and hormones extraction*

144

145 *2.2.1. Water-borne hormone sampling and solid-phase extraction (SPE)*

146 For water-borne hormone sampling and extraction we followed published  
147 methodology (see below). It is noteworthy that by measuring anti-androgen  
148 immunoreactive substances in water samples we cannot exclude some of androgenic  
149 conjugate forms (Baugh and Gray-Gaillard, 2020). Therefore, along this manuscript  
150 we refer to “water-borne androgen” by actually referring to androgens and metabolic

151 products in the holding water, as it is mentioned in similar publications (Scott et al.,  
152 2008). Every water bath consisted of a glass container (14cmx9cmx5cm) filled with  
153 40 mL of distilled water. Frogs were placed in the water bath immediately after  
154 capture and removed after 60 min, and then released at the original location.  
155 Androgens were extracted by collecting each water sample with 20 mL sterile  
156 syringes coupled to an individual C18 cartridge (SPE, Sep-Pak C18 Plus, 360 mg  
157 Sorbent, 55 - 105  $\mu\text{m}$  particle size, #WAT020515, Waters corp., Milford, MA) with a  
158 flow rate of ca. 10 mL/min. Later on, cartridges were eluted with 4 mL of 96% EtOH  
159 into 8 mL borosilicate vials and stored at 4°C until further hormonal analysis in  
160 laboratory. Samples were dried down with N<sub>2</sub> at 37°C, resuspended with 250  $\mu\text{L}$  of  
161 the assay buffer (provided in the ELISA kit, see below) and incubated overnight at  
162 4°C.

163 In order to calculate recovery efficiency of testosterone with the SPE  
164 technique, we spiked two pools with 2 different testosterone concentrations, using  
165 standards of the ELISA kit (see below). Samples were extracted and processed as  
166 described above and stored at 4°C until proceeding with the assay. Water samples  
167 “without frog” were also processed as blank controls to evaluate any possible  
168 contamination of the holding water. To assess water-borne androgen release rate, we  
169 used thirteen adult *A. femoralis* (Body-size mean  $\pm$  SD: males=2.74  $\pm$  0.03 cm, N=7;  
170 females = 2.79  $\pm$  0.02 cm, N=6) in January 2018 from a laboratory population kept at  
171 the animal care facilities at the University of Vienna. Briefly, we manually placed  
172 each frog in consecutive water baths of sampling periods of 15, 30 and 60 min. All  
173 samples were collected between 08:00 and 09:00 A.M., then extracted and processed  
174 as described above and, stored at 4°C until the assay. All frogs were fed at libitum  
175 with wingless fruit flies every second day.

176

177       2.2.2. *Parallelism between hormone concentration in blood and holding water*

178               In order to know whether water-borne androgen reflected actual levels of  
179       circulating testosterone at the time of sampling, we collected eighteen free-living  
180       adult *A. femoralis* males (Body-size mean  $\pm$  SD = 2.8  $\pm$  0.1 cm) in April 2019, from a  
181       population in the vicinity of Roura, French Guiana (4°43' N – 52°18' W). Frogs were  
182       attracted using playbacks, captured using plastic bags and transferred into individual  
183       water baths for 60 min. Water samples were processed as described above. After  
184       completion of the water baths, frogs were immediately euthanized with an overdose  
185       of 20% benzocaine gel and rapidly decapitated. Trunk blood was collected into 1.5  
186       mL Eppendorf tubes and centrifuged at 6000 rpm for 5 min (6-position rotor) to  
187       separate the plasma. Plasma volume was recorded, and samples were transferred into  
188       1.5 mL eppendorf tubes prefilled with 750  $\mu$ L of 96% ethanol. In the laboratory,  
189       testosterone was extracted from ethanol samples three times with freeze-decanting  
190       following the methodology in Goymann et al., (2007). Briefly, samples were dried  
191       down with N<sub>2</sub> at 37°C. Dried pellets were resuspended in 4 mL of dichloromethane  
192       and 100  $\mu$ L of distilled water and, then incubated at 4°C overnight for equilibration.  
193       The following day, samples were shaken for 1h and then centrifuged at 4000rpm for  
194       10 min to separate the aqueous and organic phase, which was transferred into a new  
195       tube by freeze-decanting. This process was repeated twice, and the organic phase was  
196       then dried down at 37°C under N<sub>2</sub> stream and then resuspended in the assay buffer  
197       supplied by the ELISA manufacturer and incubated overnight at 4°C.

198

199       2.3. *Simulated territorial intrusion-tests (STIs)*

200       2.3.1. *Field site and playback stimuli*



201                    Between February and April of 2018 and 2019, seventeen free-living adult *A.*  
202                    *femorialis* males (mean  $\pm$  SD = 2.95  $\pm$  0.06 cm SUL) from a population located in the  
203                    field station “Pararé” at Les Nouragues nature reserve in French Guiana (4°02’ N –  
204                    52°41’ W; Bongers et al., 2013) were used for the STI tests. STI tests consisted in  
205                    presenting the playback of an artificial advertisement call featuring the spectral and  
206                    temporal parameters of a nearby population within the nature reserve Les Nouragues  
207                    (Gasser et al., 2009; Narins et al., 2003). To avoid pseudoreplication, we created 11  
208                    different playback stimuli (16-bit, 44.1-kHz WAV-file), which varied in the inter-note  
209                    interval and the inter-call interval. Playbacks were broadcast using a loudspeaker  
210                    (Creative MUVO 2c, Creative, Singapore) connected to a music player. Sound-  
211                    pressure levels (SPLs) of every playback stimulus were calibrated at 75 – 80 dB using  
212                    an SPL-meter (Voltcraft 329) at 1 m distance by adjusting the volume setting of the  
213                    music player. All playbacks were conducted under rainless conditions and mostly  
214                    between 14:00 and 17:00h.

215

### 216                    2.3.2. Experimental design

217                    Focal males were tested using a pre-post experimental design which consists  
218                    in comparing a hormonal and behavioural baseline with a post-social stimulation  
219                    phase. During the baseline phase (A) we observed every focal male for 1 h from about  
220                    1.5 – 2 m distance and recorded the following behaviours: (1) duration of  
221                    advertisement calls in seconds, (2) duration of “warm-up” calls in seconds  
222                    (suboptimal advertisement calls of less than steady-state SPL; Jameson, 1954; Toledo  
223                    et al., 2014), (3) duration of courtship calls in seconds, (4) # of feeding events, (5) #  
224                    of head-body orientations (HBO) and (6) # of jumps. Observations were made  
225                    between 08:00 and 18:00 h. We repeated the behavioural observations at least three

226 times, at different times of the day (i.e. morning and/or afternoon), in non-consecutive  
227 days and with a minimum of three days in between observations. After every  
228 behavioural observation, each frog was gently captured with a plastic bag and  
229 immediately transferred into a water bath for 60 min to assess the baseline water-  
230 borne androgen concentration (A). Additionally, 24 females from the same population  
231 were also placed into individual water baths for 60 min in order to compare water-  
232 borne androgen baselines between sexes.

233

234 In the post-social stimulation phase (B), we confronted focal males to STIs  
235 exclusively when they were found calling. Once a focal male was located, we placed  
236 the loudspeaker on the forest ground at 1 – 1.5 m distance from the focal male. We  
237 considered a positive response (responding) when males approached the playback and  
238 reached a plastic-circular perimeter around the loudspeaker of 30 cm diameter  
239 (Amézquita et al., 2005). A negative response was recorded when males did not  
240 approach the loudspeaker and/or did not cross the perimeter before the playback was  
241 finished (non-responding). In order to determine the behavioural responsiveness of  
242 the frogs to the territorial challenge, we performed 3 STIs trials which were audio  
243 recorded and we measured the following behavioural parameters during each trial: (1)  
244 latency to the first head-body orientation towards the speaker, (2) latency to the first  
245 jump and, (3) latency until the frog reached the perimeter. Frogs were not handled or  
246 manipulated at least three days before any further STI. After the STIs (regardless  
247 whether the males responded or not) males were caught and immediately transferred  
248 to a series of three consecutive water baths of 60 min/each (1h, 2h and 3h). This  
249 sequence of water baths allowed us to determine a 3h timeline of androgen secretion  
250 in water. Time elapsed between the end of the STI and the beginning of the water

251 baths was always less than 10 min. Water samples were collected individually after  
252 every 60 min water bath without manipulating the frog to avoid stress. For this, we  
253 used two flexible polymer tubing with one end attached to the glass box and the other  
254 end attached to a 20mL syringe. One tubing was used to pump the water into the glass  
255 box and the other was used to suck out the sample after every 1h water-bath. Samples  
256 were processed and extracted as explained in the water-borne extraction section. We  
257 repeated STIs three times per focal male with at least three days between trials.

258

#### 259 *2.4. Hormone assays*

260 In order to estimate androgen concentration, we used a commercial enzymatic  
261 immunoassay for testosterone (ADI-900-065; Enzo Life Sciences, Farmingdale, NY,  
262 USA). Reconstituted samples were brought to room temperature and shaken at 500  
263 rpm for 1 h prior the assay. Samples were plated in duplicate and assays were  
264 performed following the manufacturer's protocol. Plates were read at 405 nm, with  
265 correction between 570 and 590 nm, using a microplate reader (Multiskan Go,  
266 Thermo Fisher Scientific Oy, Finland) and androgen concentrations were calculated  
267 using the Thermo Scientific SkanIt Software (version 4.1). The detection limit for the  
268 assay was 5.67 pg mL<sup>-1</sup>. The cross reactivity of the testosterone antibody with other  
269 androgens was below 15% (see manufacturers manual). The average intra- and inter-  
270 assay coefficient of variation were 3.38% and 11.05%, respectively.

271

#### 272 *2.5. Statistical analysis*

273 Prior to analysis, hormone data were log-transformed to fit normality when  
274 necessary. In order to know whether water-borne androgen concentration was  
275 dependent on the frogs' body size and/or body area, we first calculated the body area-

276 SUL ratio for every frog. Later, we performed separate linear mixed models (LMM)  
277 for afternoon and morning baselines as response variables, body area-SUL ratio as  
278 fixed factor and the ID of the frogs as random factor. Because androgen baseline  
279 concentrations in the afternoon or the morning were not dependent on body area-SUL  
280 ratio (LMM:  $\beta_{morning}=1.18$ ,  $t=1.22$ ,  $P=0.22$ ;  $\beta_{afternoon}=1.68$ ,  $t=1.61$ ,  $P=0.11$ ), water-  
281 borne androgen levels were not corrected for body size or area. In order to determine  
282 the release rate of androgens in water, we compared the time series water baths (15,  
283 30 and 60 min) by performing a LMM to account for the repeated measurements,  
284 using the “lmer” function within the *lme4* package (Bates et al., 2015) in R (R Core  
285 Team, 2017). We used androgen concentration as the response variable, the time  
286 series of water baths as the fixed factor and the frog ID as the random factor.

287  
288 To determine the parallelism between hormone concentration in blood and  
289 holding water, we performed a parametric correlation between the plasma and water-  
290 borne androgen concentrations using the Pearson’s product moment correlation  
291 coefficient. In order to compare water-borne androgen levels between males and  
292 females, we performed a two-sample t-test. Since time of the day, vocal and  
293 locomotor activity might be interdependent with androgen concentrations (Wada,  
294 1986), we asked whether baseline androgen levels were dependent on natural  
295 behaviours and varied across the day. For this, we first performed a LMM with water-  
296 borne androgen levels as response variable, time of the day (morning/afternoon) as  
297 fixed factor and frog ID as the random factor. Then, we performed a Varimax  
298 normalized principal component analysis (PCA) in order to minimize redundancy  
299 among the behavioural variables by using the function “principal” within the R  
300 package *psych* (Revelle, 2019). Further, we performed a series of independent LMMs

301 with the scores of the principal components obtained as response variables, time of  
302 the day (morning/afternoon) and water-borne androgen levels as fixed factors and  
303 frog ID as the random factor.

304

305 In order to investigate whether *A. femoralis* males respond to territorial  
306 challenges (STIs) with an increase in androgen levels, we first performed a LMM  
307 with androgen concentration as dependent variable, and the sampling time points (0h-  
308 morning/afternoon baselines-, 1h, 2h and 3h water bath sampling after STIs) as fixed  
309 effects. We used frog ID as the random factor to account for repeated measurements.  
310 In order to compare the androgen responsiveness to STIs between responding and  
311 non-responding males, we estimated the androgen responsiveness to male-male  
312 interactions ( $R_{\text{male-male}}$ ; Goymann et al., 2007) by computing the within-subjects  
313 standardized effect size (Cohen's  $d$ ) of the ratio between the water-borne testosterone  
314 concentration of every male after the STI and the baseline levels. Cohen's  $d$  allows us  
315 to directly compare the magnitude of the androgen response by estimating the  
316 difference between pre (baseline) and post (STI-challenged frogs) water-borne  
317 androgen concentrations on a standardized scale (Goymann et al., 2007). For this, we  
318 used the function "cohens.d" within the R package *misty* (Yanagida, 2020).

319 Finally, in order to know whether the phonotactic approach of *A. femoralis*  
320 males is proportional with the androgen responsiveness, we first minimized  
321 redundancy among the three responsiveness latencies (latency to the first head-body  
322 orientation towards the speaker, latency to the first jump and, latency until the frog  
323 reached the perimeter) by using a varimax normalized principal component analysis  
324 (PCA). Then, we performed a LMM with the principal component scores as the

325 response variable, the androgen responsiveness ( $R_{\text{male-male}}$ ) as the fixed effect predictor  
326 and the male ID as the random effect.

327

## 328 2.6. Ethics approval

329 All experiments were conducted in strict accordance with current Austrian,  
330 French and European Union laws and were approved by the Animal Ethics and  
331 Experimentation Board of the University of Vienna (No. 2018-010; 2019-002). Our  
332 study was approved by the technical director of the “Nouragues Ecological Research  
333 Station” where field work was conducted. We adhere to the “Guidelines for the use of  
334 live amphibians and reptiles in field and laboratory research” by the Herpetological  
335 Animal Care and Use Committee (HACC) of the American Society of Ichthyologists  
336 and Herpetologists. Collection permits were provided by the *Ministère de la*  
337 *transition écologique et solidaire, République Française* (No. TREL1902817S/152).

338

## 339 3. Results

340

### 341 3.1. Validation and sex differences of water-borne androgens

342 Recoveries of low and high standards were 98.21% and 105.98%,  
343 respectively. “Blank” water samples were below the detection limit of the assay  
344 (**Figure 1A**). Correlation between expected and obtained androgen concentrations in  
345 2 mL aliquots was highly significant ( $r=0.99$ ,  $P=0.006$ ; **Figure 1B**), and falls within  
346 the range of detectability of the assay. Androgens released in 60 min water baths was  
347 significantly higher than 15 min (LMM:  $\beta=-112.43$ ,  $t=-2.33$ ,  $P=0.03$ ; **Figure 1C**), but  
348 not than 30 min water baths (LMM:  $\beta=-46.05$ ,  $t=-0.95$ ,  $P=0.35$ ; **Figure 1C**). Males  
349 had higher water-borne androgen levels than females in 60-min water baths (water-

350 borne androgen mean  $\pm$  SD: males=317.30 $\pm$ 78.67 pg/mL; females=243.64 $\pm$ 170.70  
351 pg/mL; two sample t-test:  $t_{(33,51)} = -3.07$ ,  $P=0.004$ ; **Figure 2**). Water-borne androgen  
352 concentration was positively correlated with plasma testosterone concentration  
353 ( $t=4.82$ ,  $r=0.76$ ,  $P<0.001$ ; **Figure 3**).

354

### 355 *3.2. Daily variation of behaviours and water-borne androgen levels*

356 Three components were generated with eigenvalues greater than 1 (**Table 1**):  
357 the first component (PC1) held 39% of the explained variance and represented  
358 positively vocal behaviour variables (advertisement and warm-up call durations). The  
359 second component (PC2) accounted for 31% of the source of variation and  
360 represented positively courtship behaviour variables (number of HBOs, jumps and  
361 duration of courtship calls). The third component (PC3) explained 30% of the  
362 variance and represented positively variables related to foraging behaviour (number  
363 of HBOs and feeding events).

364 Baseline water-borne androgen concentrations and vocal behaviour (PC1)  
365 were significantly higher in the afternoon than in the morning (water-borne  
366 androgens:  $\beta=0.31$ ,  $t=2.55$ ,  $P=0.01$ ; **Figure 4A**; PC1:  $\beta=0.56$ ,  $t=3.62$ ,  $P<0.001$ ;  
367 **Figure 4B**). However, vocal behaviour was not dependent on water-borne androgen  
368 concentrations (PC1:  $\beta=0.07$ ,  $t=0.42$ ,  $P=0.67$ ; **Figure 4B**). Courtship behaviour (PC2)  
369 and foraging behaviour (PC3) were not significantly different over the day (PC2:  
370  $\beta=0.28$ ,  $t=1.52$ ,  $P=0.13$ ; **Figure 4C**; PC3:  $\beta=-0.02$ ,  $t=-0.1$ ,  $P=0.92$ ; **Figure 4D**) and/or  
371 dependent on water-borne androgen concentrations (PC2:  $\beta=0.1$ ,  $t=0.55$ ,  $P=0.58$ ;  
372 **Figure 4C**; PC3:  $\beta=0.19$ ,  $t=1$ ,  $P=0.32$ ; **Figure 4D**).

373

### 374 *3.3. Effect of STI on water-borne androgen levels ( $R_{\text{male-male}}$ )*

375                   When frogs responded approaching towards the playback (i.e. positive  
376                   phonotaxis), water-borne androgen levels significantly increased 1h after the STI  
377                   compared to the baseline water-borne androgen levels in the morning (LMM:  $\beta=0.40$ ,  
378                    $t=3.49$ ,  $P=0.001$ ; **Figure 5A**) and in the afternoon (LMM:  $\beta=0.21$ ,  $t=0.10$ ,  $P=0.04$ ;  
379                   **Figure 5A**). Subsequently, androgen concentration dropped nearly to the morning  
380                   baseline in the 2h sampling point and under both, morning and afternoon baselines in  
381                   the 3h sampling point (**Figure 5A**).

382                   Responsive males to the playback had a positive effect size and 95%  
383                   confidence intervals crossed zero (Cohen's  $d = 0.85 \pm 0.94$ ; **Figure 5B**), suggesting a  
384                   positive effect of STI tests on water-borne androgen levels. On the other hand, non-  
385                   responsive males had a negative (and close to zero) effect size and 95% confidence  
386                   intervals did not cross zero (Cohen's  $d = -0.06 \pm 1.15$ ; **Figure 5B**), and thus  
387                   suggesting a null effect of STIs on androgen levels.

388

### 389                   3.4. Effect of STI on the phonotactic behaviour

390                   Three principal components were generated, but just one component with an  
391                   eigen value greater than 1, which explained the 72% of the total variance (**Table 2**).  
392                   This component represented positively the three responsiveness latencies (latency to  
393                   the first head-body orientation towards the speaker, latency to the first jump and,  
394                   latency until the frog reached the perimeter). The phonotactic approach of *A.*  
395                   *femoralis* males towards the playback was not related to the androgen responsiveness  
396                   (LMM:  $\beta=0.58$ ,  $t=0.55$ ,  $P=0.58$ ).

397

## 398                   4. Discussion

399



400                   Thirty years ago, an explanation for the facultative increase of males’  
401 androgen levels in response to social challenges was named as the “Challenge  
402 Hypothesis” (Wingfield et al., 1990). Since then, numerous studies have been testing  
403 this hypothesis across different animal taxa with diverse life history. In this study we  
404 tested the Challenge Hypothesis in the highly territorial poison frog, *Allobates*  
405 *femorialis*. To do so, we compared males’ androgen concentrations quantified both in  
406 a non-stimulated condition (baseline) and following a simulated territorial intrusion  
407 (post-STI). We took advantage of water-borne hormones sampling, a non-invasive  
408 technique, to characterize androgen levels and could show that it closely reflects  
409 circulating plasma testosterone levels. Our results demonstrate that water-borne  
410 androgen increases after a STI in *A. femoralis* males only when males approached the  
411 playback loudspeaker. Therefore, our results provide novel support to the Challenge  
412 Hypothesis in a territorial frog. The intensity of the phonotaxis to the playback,  
413 however, was not related to males’ androgen responsiveness to STIs.

414  
415                   Water-borne androgen concentration significantly increased 1h after  
416 confronting *A. femoralis* males to STIs (i.e. playbacks). The Challenge Hypothesis  
417 predicts a short-term but distinct increase of androgen levels in response to social  
418 challenges (e.g. male-male competition). To the best of our knowledge, the only  
419 previous study that provides support for the challenge hypothesis in an amphibian  
420 species showed that males of the túngara frog (*Engystomops pustulosus*) increased  
421 water-borne testosterone after being challenged with a combined chemical (holding  
422 water containing excretions of conspecific calling males) and acoustic stimulus (Still  
423 et al., 2019). The general idea of the functional significance of the increase of  
424 testosterone above the breeding baseline levels is likely to prepare males for a

425 potential agonistic encounter, such as by increasing its muscular contractile capacity  
426 and locomotor performance (Miles et al., 2007). In territorial species, this  
427 physiological boost is advantageous as it increases the chances of winning physical  
428 contests against intruders when competing for space and resources. Thus, androgen  
429 responsiveness to STIs in *A. femoralis* males is similar to that found in other  
430 vertebrates for which the Challenge Hypothesis is supported (reviewed by Moore et  
431 al., 2019).

432  
433 As predicted by the Challenge Hypothesis, we observed a significant positive  
434 effect of STIs on water-borne androgen levels only in *A. femoralis* males that  
435 approached the playback, while those which did not approach also did not show an  
436 increase in water-borne androgen levels. Previous research in *A. femoralis* has  
437 proposed that males' decision to approach an intruder and engage in a contest depends  
438 on whether the intruder represents a perceptible risk or not (Ursprung et al., 2009).  
439 The increased androgen levels might be consequent to the perception of an aggressive  
440 territorial intrusion, which might increase the likelihood to perform aggressive  
441 displays to repel the rival (Wingfield, 2005). However, other factors like the presence  
442 of another male (or a robotic decoy; Narins et al., 2003) or the motivational state of  
443 the challenged male might trigger a positive phonotaxis. Likewise, steroid hormones  
444 have been shown to act on brain areas related with the expression of the motivational  
445 state to approach and recognize competing signals (Oliveira, 2004; Adkins-Regan,  
446 2005; Yao et al., 2008; Leary, 2009). Further research is needed to determine which  
447 factors influence the motivation to approach and attack an intruder in *A. femoralis*.

448

449                   Despite a short-term increase in testosterone levels associated to a positive  
450 phonotaxis towards the loudspeaker, we did not find a relationship between androgen  
451 responsiveness and the latency of approach. In other words, males with higher  
452 androgen levels did not approach the STI faster. This may depend on the experimental  
453 setup of the STI and the nature of the STI stimuli (i.e. duration of the playback, live  
454 vs. synthetic decoy; reviewed by Goymann et al., 2007). For instance, an androgen  
455 response was only elicited in the túngara frog when chemical and acoustic stimuli  
456 were presented in combination (Still et al., 2019). Although *A. femoralis* males are  
457 strongly territorial and usually males jump towards the sound source in playback  
458 experiments (Hödl, 1983), they require to be confronted by bimodal signals (acoustic  
459 and visual) in order to display physical attacks (Narins et al., 2003). Thus, in *A.*  
460 *femoralis* males, playbacks alone may be enough to provoke a phonotactic reaction  
461 followed by an androgen response, but the intensity of phonotactic approach may  
462 depend on the combination of acoustic and visual signals (see also Sonnleitner et al.  
463 2020). Further experiments on the hormonal and behavioural response to territorial  
464 intrusions in territorial frogs may profit from the combination of playbacks and  
465 robotic frog models in order to create more realistic situations.

466  
467                   We found higher water-borne androgen concentrations in males compared to  
468 females of *A. femoralis*. Androgens are the main class of sex hormones in male  
469 vertebrates and circulating androgens are typically lower in female vertebrates. In  
470 amphibians, several studies have found sex differences in plasma androgen levels,  
471 where males have higher circulating baseline concentrations than females. High  
472 androgen concentrations in male amphibians play a key role in the performance of  
473 territorial and reproductive behaviours such as vocal and clasping behaviours

474 (Reviewed by Moore et al., 2005). However, it is noteworthy that hormonal  
475 differences between sexes are dynamic and change across behavioural contexts and at  
476 different life history stages (e.g. parental care, mating systems, sex-specific  
477 behaviours), rather than simply physiological differences settled through ontogeny  
478 (Adkins-Regan, 2005; Fischer and O'Connell, 2020). For instance, previous studies in  
479 other amphibian species have shown that females can show higher levels of  
480 androgens than males in relation to secretion of oestrogen, given that androgens are  
481 an obligate intermediate of oestrogen synthesis (i.e. aromatization; Delrio et al., 1979;  
482 Licht et al., 1983). In our study, we observed a large variation in water-borne  
483 androgen concentrations in *A. femoralis* females, with some individuals reaching even  
484 higher levels than males. At present, we can only speculate that such variation may be  
485 related to the breeding pattern of *A. femoralis*, which is an opportunistic breeder and  
486 males may have relatively low androgen concentrations throughout the year and not  
487 differ significantly from females outside reproductive periods.

488

489 The positive correlation between plasma and water-borne androgens in *A.*  
490 *femoralis* is in line with that found in other species e.g. fishes and amphibians (Baugh  
491 et al., 2018; Gabor et al., 2016, 2013; Kidd et al., 2010; but see Millikin et al., 2019  
492 for non-correlation between water-borne and plasma corticosterone in spotted  
493 salamanders). Water-borne sampling has enormous advantages for estimating  
494 hormonal concentrations with little manipulation of the research animals (Narayan,  
495 2013). Another benefit of water-borne sampling is that it can be performed repeatedly  
496 without harming the animal. For instance, researchers can evaluate hormone  
497 concentrations of individuals in different life history stages (Adkins-Regan, 2005;  
498 Baugh and Gray-Gaillard, 2020; Leary, 2009) and/or, compare hormonal responses

499 between pre- and post-challenges (Bell, 2019; Still et al., 2019). Thus, in many cases  
500 water-borne sampling might even constitute a preferable alternative to invasive  
501 methods (i.e. blood sampling), offering new ways on how to study the interplay  
502 between social behaviour and hormones (Bell, 2019; Narayan, 2013; Wingfield et al.,  
503 2006).

504

505 We observed that water-borne androgen levels and vocal activity were higher  
506 in the afternoon than in the morning in *A. femoralis* males. In fact, previous research  
507 has found a higher calling activity peak of *A. femoralis* in the afternoon compared to  
508 the morning (between 1500-1730 h; Kaefer et al., 2012; Roithmair, 1992). *Allobates*  
509 *femoralis* males use advertisement calls to engage in social interactions with  
510 conspecifics (e.g. territory tenancy advertisement, inter-male spacing, courtship;  
511 Ringler et al., 2017; Rodríguez et al., 2020; Stückler et al., 2019). Interestingly, vocal  
512 behaviour was not dependent on androgen levels in *A. femoralis* males. Previous work  
513 reported positive association between testosterone and vocal behaviour in anuran  
514 amphibians (see below). Testosterone not only regulates the development of  
515 structures related to vocalization and neural pathways for the control of sound  
516 production (Reviewed by Leary, 2009; Moore et al., 2005), but also the motivation for  
517 calling and calling effort are androgen dependent in anurans (Burmeister and  
518 Wilczynski, 2001; Emerson and Hess, 1996; Solís and Penna, 1997). However,  
519 previous studies also showed that castrated and androgen treated males did not  
520 maintain or increase vocal behaviour (Burmeister and Wilczynski, 2001; Wetzel and  
521 Kelley, 1983), suggesting that androgens are needed but not the only hormones for  
522 eliciting vocal behaviour.

523

524                   We found that elements related to courtship and foraging behaviour (e.g. # of  
525 head-body orientation, # of jumps, # of feeding events, courtship call duration) did  
526 not vary across the day in *A. femoralis* males. This result is not surprising, because  
527 courtship behaviour in *A. femoralis* males consists in a combination of acoustic cues  
528 (advertisement and courtship call) and a series of short locomotor events (courtship  
529 march), which usually start in the late afternoon (~17:15 h) and resume on the next  
530 morning (ending around 08:11 h; Stückler et al., 2019). Also, *A. femoralis* has a  
531 generalist feeding pattern and eats prey throughout the day (Pough and Taigen, 1990;  
532 Toft, 1980). Further, we found no relationship between courtship and foraging  
533 behaviour and water-borne androgen levels. Although vocal and courtship behaviours  
534 are androgen-dependent in most acoustically communicating species, the expression  
535 of socially evoked behaviours in other anurans depend also on other hormones such as  
536 neuropeptides, and/or the interaction between both classes of hormones (reviewed by  
537 Moore et al., 2005). For instance, the neuropeptide arginine vasotocin influences the  
538 motivation to call and courtship behaviour in frogs and salamanders (Burmeister and  
539 Wilczynski, 2001; Leary, 2009; Propper and Dixon, 1997), and at the same time its  
540 concentration in the brain depends on androgen concentrations (Boyd, 1994). The  
541 synergistic effects of androgen hormones and neuropeptides on courtship behaviour  
542 need further investigation in poison frogs.

543

544                   Water-borne androgen was increased 1h after the STI but returned to baseline  
545 levels 2h after the STI. There are at least two possible reasons for such a pattern. First,  
546 short-term changes in androgen levels in non-seasonal breeders have been associated  
547 with the trade-off between parental care and aggressiveness (Wingfield et al., 1990).  
548 In other words, androgen levels can facultatively rise during male-male contests but

549 decrease when males are parenting the broods. *Allobates femoralis* males typically  
550 perform tadpole transport and, although we were unable to evaluate the effect of  
551 parental care before or after presenting the STIs, unpublished data suggest that  
552 parenting males have significantly lower water-borne androgen compared to non-  
553 parenting males (Rodríguez et al., unpublished data). Second, there are costs  
554 associated with maintaining high androgen levels for a prolonged period of time such  
555 as the suppression of immune function, increasing of parasitic infections (Folstad and  
556 Karter, 1992) and impairing parental care (Wingfield et al., 1990). Thus, the return of  
557 androgens to baseline levels after a short-term increase may ease the resume of  
558 ongoing activities just before the intrusion. Interestingly, water-borne androgen levels  
559 went below the pre-STI baseline levels 3h after the STI. This reduction might be the  
560 consequence of negative feedback of the hypothalamo-pituitary-interrenal (HPI) axis  
561 (Yao & Denver, 2007). Additionally, we cannot exclude that there are some inhibitory  
562 effects caused by a stress response resulting from the isolation of the frogs for a  
563 prolonged period of time in the glass box. Additional research is necessary to further  
564 investigate these questions in *A. femoralis*.

565

## 566 **5. Conclusions**

567

568 Our study is one of the first to support the Challenge Hypothesis in a territorial  
569 frog, by using STIs and a non-invasive technique to characterize androgen levels. We  
570 found that water-borne androgen is responsive to social challenges in males of the  
571 highly territorial poison frog, *Allobates femoralis*. Since water-borne hormones  
572 provide biologically and physiologically relevant information by mirroring hormone  
573 levels in plasma, the integration of territorial intrusion experiments and non-invasive

574 hormone sampling may allow researchers to test the “Challenge Hypothesis” in  
575 animal systems with a broad suite of life histories.

576

## 577 **Acknowledgements**

578 We thank the Nouragues research field station (managed by CNRS) which benefits from  
579 “Investissement d'Avenir” grants managed by Agence Nationale de la Recherche (AnaEE  
580 FranceANR-11-INBS-0001; Labex CEBA ANR-10-LABX-25-01). This work was  
581 funded by the Austrian Science Fund (FWF): W1262-B29. We specially thank the Vienna  
582 Zoo (Schönbrunner Tiergarten Ges.m.b.H), the Austrian Herpetological Society  
583 (Österreichische Gesellschaft für Herpetologie) and the Centre National de la Recherche  
584 Scientifique (CNRS) for additional funding provided to CR. We are especially grateful  
585 with P. Gaucher and N. Marchand for the invaluable logistic support. For providing field  
586 assistance we are grateful with A. Lembens, K. Dellefont, C. Leeb and M. Peignier.

587

## 588 **References**

589

590 Adkins-Regan, E., 2005. Hormones and animal social behavior, Monographs in behavior and  
591 ecology. Princeton University Press, Princeton.

592 Amézquita, A., Castellanos, L., Hödl, W., 2005. Auditory matching of male *Epipedobates*  
593 *femoralis* (Anura: Dendrobatidae) under field conditions. Anim. Behav. 70, 1377–  
594 1386. <https://doi.org/10.1016/j.anbehav.2005.03.012>

595 Amézquita, A., Hödl, W., Lima, A.P., Castellanos, L., Erdtmann, L., de Araújo, M.C., 2006.  
596 Masking interference and the evolution of the acoustic communication system in the  
597 Amazonian dendrobatid frog *Allobates femoralis*. Evol. Int. J. Org. Evol. 60, 1874–  
598 1887.



- 599 AmphibiaWeb [WWW Document], 2020. . AmphibiaWeb. URL <https://amphibiaweb.org>
- 600 Bates, D., Mächler, M., Bolker, B., Walker, S., 2015. Fitting Linear Mixed-Effects Models  
601 Using lme4. J. Stat. Softw. 67, 1–48. <https://doi.org/10.18637/jss.v067.i01>
- 602 Baugh, A.T., Bastien, B., Still, M.B., Stowell, N., 2018. Validation of water-borne steroid  
603 hormones in a tropical frog (*Physalaemus pustulosus*). Gen. Comp. Endocrinol. 261,  
604 67–80. <https://doi.org/10.1016/j.yggen.2018.01.025>
- 605 Baugh, A.T., Gray-Gaillard, S.L., 2020. Excreted testosterone and male sexual proceptivity: a  
606 hormone validation and proof-of-concept experiment in túngara frogs. General and  
607 Comparative Endocrinology 113638. <https://doi.org/10.1016/j.yggen.2020.113638>
- 608 Bell, A.M., 2019. Individual variation and the challenge hypothesis. Horm. Behav. 104549.  
609 <https://doi.org/10.1016/j.yhbeh.2019.06.013>
- 610 Bongers, F., Charles-Dominique, P., Forget, P.-M., Théry, M., 2013. Nouragues: dynamics  
611 and plant-animal interactions in a neotropical rainforest. Springer Science & Business  
612 Media.
- 613 Boulenger, G.A., 1883. On a collection of frogs from Yurimaguas, Huallaga River, northern  
614 Peru, in: Proceedings of the Zoological Society of London. Wiley Online Library, pp.  
615 635–638.
- 616 Boyd, S.K., 1994. Gonadal Steroid Modulation of Vasotocin Concentrations in the Bullfrog  
617 Brain. Neuroendocrinology 60, 150–156. <https://doi.org/10.1159/000126745>
- 618 Burmeister, S.S., Wilczynski, W., 2001. Social Context Influences Androgenic Effects on  
619 Calling in the Green Treefrog (*Hyla cinerea*). Horm. Behav. 40, 550–558.  
620 <https://doi.org/10.1006/hbeh.2001.1723>
- 621 de Assis, V.R., Navas, C.A., Mendonça, M.T., Gomes, F.R., 2012. Vocal and territorial  
622 behavior in the Smith frog (*Hypsiboas faber*): Relationships with plasma levels of

- 623 corticosterone and testosterone. *Comp. Biochem. Physiol. A. Mol. Integr. Physiol.*  
624 163, 265–271. <https://doi.org/10.1016/j.cbpa.2012.08.002>
- 625 Delrio, G., D'istria, M., Iela, L., Chieffi, G., 1979. The possible significance of testosterone  
626 in the female green frog *Rana esculenta*. *Bolletino Zool.* 46, 1–9.  
627 <https://doi.org/10.1080/11250007909440271>
- 628 Emerson, S.B., Hess, D.L., 1996. The Role of Androgens in Opportunistic Breeding, Tropical  
629 Frogs. *Gen. Comp. Endocrinol.* 103, 220–230.  
630 <https://doi.org/10.1006/gcen.1996.0113>
- 631 Fischer, E.K., O'Connell, L.A., 2020. Hormonal and neural correlates of care in active versus  
632 observing poison frog parents. *Horm. Behav.* 120, 104696.  
633 <https://doi.org/10.1016/j.yhbeh.2020.104696>
- 634 Folstad, I., Karter, A.J., 1992. Parasites, Bright Males, and the Immunocompetence  
635 Handicap. *Am. Nat.* 139, 603–622. <https://doi.org/10.1086/285346>
- 636 Fusani, L., Canoine, V., Goymann, W., Wikelski, M., Hau, M., 2005. Difficulties and special  
637 issues associated with field research in behavioral neuroendocrinology. *Horm. Behav.*  
638 48, 484–491. <https://doi.org/10.1016/j.yhbeh.2005.05.005>.
- 639 Gabor, C.R., Gabor, C.R., Bosch, J., Gabor, C.R., Bosch, J., Fries, J.N., Gabor, C.R., Bosch,  
640 J., Fries, J.N., Davis, D.R., 2013. A non-invasive water-borne hormone assay for  
641 amphibians. *Amphib.-Reptil.* 34, 151–162. [https://doi.org/10.1163/15685381-](https://doi.org/10.1163/15685381-00002877)  
642 [00002877](https://doi.org/10.1163/15685381-00002877)
- 643 Gabor, C.R., Zabierek, K.C., Kim, D.S., da Barbiano, L.A., Mondelli, M.J., Bendik, N.F.,  
644 Davis, D.R., 2016. A Non-Invasive Water-Borne Assay of Stress Hormones in  
645 Aquatic Salamanders. *Copeia* 104, 172–181. <https://doi.org/10.1643/OT-14-207>

- 646 Gasser, H., Amézquita, A., Hödl, W., 2009. Who is Calling? Intraspecific Call Variation in  
647 the Aromobatid Frog *Allobates femoralis*. *Ethology* 115, 596–607.  
648 <https://doi.org/10.1111/j.1439-0310.2009.01639.x>
- 649 Goymann, W., 2012. On the use of non-invasive hormone research in uncontrolled, natural  
650 environments: the problem with sex, diet, metabolic rate and the individual. *Methods*  
651 *in Ecology and Evolution* 3, 757–765. [https://doi.org/10.1111/j.2041-](https://doi.org/10.1111/j.2041-210X.2012.00203.x)  
652 [210X.2012.00203.x](https://doi.org/10.1111/j.2041-210X.2012.00203.x)
- 653 Goymann, W., Landys, M.M., Wingfield, J.C., 2007. Distinguishing seasonal androgen  
654 responses from male–male androgen responsiveness—Revisiting the Challenge  
655 Hypothesis. *Horm. Behav.* 51, 463–476. <https://doi.org/10.1016/j.yhbeh.2007.01.007>
- 656 Hau, M., Goymann, W., 2015. Endocrine mechanisms, behavioral phenotypes and plasticity:  
657 known relationships and open questions. *Front. Zool.* 12, S7.  
658 <https://doi.org/10.1186/1742-9994-12-S1-S7>
- 659 Hödl, W., 1983. *Phyllobates femoralis* (Dendrobatidae): Rufverhalten und akustische  
660 Orientierung der Männchen (Freilandaufnahmen). *Wiss. Film* 30, 12–19.
- 661 Jameson, D.L., 1954. Social Patterns in the Leptodactylid Frogs *Syrhophus* and  
662 *Eleutherodactylus*. *Copeia* 1954, 36–38.
- 663 Kaefer, I.L., Montanarin, A., Da Costa, R.S., Lima, A.P., 2012. Temporal patterns of  
664 reproductive activity and site attachment of the brilliant-thighed frog *Allobates*  
665 *femoralis* from central Amazonia. *J. Herpetol.* 46, 549–554.
- 666 Kidd, C.E., Kidd, M.R., Hofmann, H.A., 2010. Measuring multiple hormones from a single  
667 water sample using enzyme immunoassays. *Gen. Comp. Endocrinol.* 165, 277–285.  
668 <https://doi.org/10.1016/j.ygcen.2009.07.008>
- 669 Leary, C.J., 2009. Hormones and acoustic communication in anuran amphibians. *Integr.*  
670 *Comp. Biol.* 49, 452–470. <https://doi.org/10.1093/icb/icp027>

- 671 Licht, P., McCreery, B.R., Barnes, R., Pang, R., 1983. Seasonal and stress related changes in  
672 plasma gonadotropins, sex steroids, and corticosterone in the bullfrog, *Rana*  
673 *catesbeiana*. Gen. Comp. Endocrinol. 50, 124–145. <https://doi.org/10.1016/0016->  
674 6480(83)90249-6
- 675 Miles, D.B., Sinervo, B., Hazard, L.C., Svensson, E.I., Costa, D., 2007. Relating  
676 endocrinology, physiology and behaviour using species with alternative mating  
677 strategies. Funct. Ecol. 21, 653–665. <https://doi.org/10.1111/j.1365->  
678 2435.2007.01304.x
- 679 Millikin, A.R., Woodley, S.K., Davis, D.R., Moore, I.T., Anderson, J.T., 2019. Water-borne  
680 and plasma corticosterone are not correlated in spotted salamanders. Ecol. Evol. 9,  
681 13942–13953. <https://doi.org/10.1002/ece3.5831>
- 682 Montanarin, A., Kaefer, I.L., Lima, A.P., 2011. Courtship and mating behaviour of the  
683 brilliant-thighed frog *Allobates femoralis* from Central Amazonia: implications for the  
684 study of a species complex. Ethol. Ecol. Evol. 23, 141–150.
- 685 Moore, F.L., Boyd, S.K., Kelley, D.B., 2005. Historical perspective: Hormonal regulation of  
686 behaviors in amphibians. Horm. Behav. 48, 373–383.  
687 <https://doi.org/10.1016/j.yhbeh.2005.05.011>
- 688 Moore, I.T., Hernandez, J., Goymann, W., 2019. Who rises to the challenge? Testing the  
689 Challenge Hypothesis in fish, amphibians, reptiles, and mammals. Horm. Behav.  
690 S0018506X19301916. <https://doi.org/10.1016/j.yhbeh.2019.06.001>
- 691 Narayan, E.J., 2013. Non-invasive reproductive and stress endocrinology in amphibian  
692 conservation physiology. Conserv. Physiol. 1, cot011–cot011.  
693 <https://doi.org/10.1093/conphys/cot011>
- 694 Narins, P.M., Feng, A.S., Fay, R.R., 2006. Hearing and Sound Communication in  
695 Amphibians, Springer Handbook of Auditory Research. Springer New York.

- 696 Narins, P.M., Hödl, W., Grabul, D.S., 2003. Bimodal signal requisite for agonistic behavior  
697 in a dart-poison frog, *Epipedobates femoralis*. Proc. Natl. Acad. Sci. 100, 577–580.  
698 <https://doi.org/10.1073/pnas.0237165100>
- 699 Pašukonis, A., Loretto, M.-C., Landler, L., Ringler, M., Hödl, W., 2014a. Homing trajectories  
700 and initial orientation in a Neotropical territorial frog, *Allobates femoralis*  
701 (Dendrobatidae). Front. Zool. 11, 29. <https://doi.org/10.1186/1742-9994-11-29>
- 702 Pašukonis, A., Ringler, M., Brandl, H.B., Mangione, R., Ringler, E., Hödl, W., 2013. The  
703 Homing Frog: High Homing Performance in a Territorial Dendrobatid Frog *Allobates*  
704 *femoralis* (Dendrobatidae). Ethology 119, 762–768. <https://doi.org/10.1111/eth.12116>
- 705 Pašukonis, A., Trenkwalder, K., Ringler, M., Ringler, E., Mangione, R., Steininger, J.,  
706 Warrington, I., Hödl, W., 2016. The significance of spatial memory for water finding  
707 in a tadpole-transporting frog. Anim. Behav. 116, 89–98.
- 708 Pašukonis, A., Warrington, I., Ringler, M., Hödl, W., 2014b. Poison frogs rely on experience  
709 to find the way home in the rainforest. Biol. Lett. 10, 20140642.  
710 <https://doi.org/10.1098/rsbl.2014.0642>
- 711 Pough, F.H., Taigen, T.L., 1990. Metabolic correlates of the foraging and social behaviour of  
712 dart-poison frogs. Anim. Behav. 39, 145–155. [https://doi.org/10.1016/S0003-](https://doi.org/10.1016/S0003-3472(05)80734-1)  
713 [3472\(05\)80734-1](https://doi.org/10.1016/S0003-3472(05)80734-1)
- 714 Pröhl, H., 2005. Territorial Behavior in Dendrobatid Frogs. J. Herpetol. 39, 354–365.
- 715 Propper, C.R., Dixon, T.B., 1997. Differential Effects of Arginine Vasotocin and  
716 Gonadotropin-Releasing Hormone on Sexual Behaviors in an Anuran Amphibian.  
717 Horm. Behav. 32, 99–104. <https://doi.org/10.1006/hbeh.1997.1408>
- 718 R Core Team, 2017. R: A Language and Environment for Statistical Computing. R  
719 Foundation for Statistical Computing, Vienna, Austria.

- 720 Revelle, W., 2019. psych: Procedures for Psychological, Psychometric, and Personality  
721 Research. Northwestern University, Evanston, Illinois.
- 722 Ringler, E., Pašukonis, A., Hödl, W., Ringler, M., 2013. Tadpole transport logistics in a  
723 Neotropical poison frog: indications for strategic planning and adaptive plasticity in  
724 anuran parental care. *Front. Zool.* 10, 67.
- 725 Ringler, E., Szipl, G., Harrigan, R.J., Bartl-Binder, P., Mangione, R., Ringler, M., 2018.  
726 Hierarchical decision-making balances current and future reproductive success. *Mol.*  
727 *Ecol.* 27, 2289–2301. <https://doi.org/10.1111/mec.14583>
- 728 Ursprung, E., Ringler, M., Hödl, W., 2009. Phonotactic approach pattern in the neotropical  
729 frog *Allobates femoralis*: A spatial and temporal analysis. *Behaviour* 146, 153–170.  
730 <https://doi.org/10.1163/156853909X410711>
- 731 Ringler, M., Ringler, E., Mendoza, D.M., Hödl, W., 2011. Intrusion experiments to measure  
732 territory size: development of the method, tests through simulations, and application  
733 in the frog *Allobates femoralis*. *PLoS One* 6, e25844.
- 734 Ringler, M., Szipl, G., Hödl, W., Khil, L., Kofler, B., Lonauer, M., Provin, C., Ringler, E.,  
735 2017. Acoustic ranging in poison frogs—it is not about signal amplitude alone.  
736 *Behav. Ecol. Sociobiol.* 71, 114. <https://doi.org/10.1007/s00265-017-2340-2>
- 737 Rodríguez, C., Amézquita, A., Ringler, M., Pašukonis, A., Hödl, W., 2020. Calling amplitude  
738 flexibility and acoustic spacing in the territorial frog *Allobates femoralis*. *Behav.*  
739 *Ecol. Sociobiol.* 74, 76. <https://doi.org/10.1007/s00265-020-02857-6>
- 740 Rodríguez, C., Hödl, W., 2020. Sound radiation pattern of the advertisement call of the  
741 highly territorial poison frog *Allobates femoralis*. *Behav. Processes* 170, 103996.  
742 <https://doi.org/10.1016/j.beproc.2019.103996>

- 743 Roithmair, M.E., 1992. Territoriality and Male Mating Success in the Dart-poison Frog,  
744 *Epipedobates femoralis* (Dendrobatidae, Anura). *Ethology* 92, 331–343.  
745 <https://doi.org/10.1111/j.1439-0310.1992.tb00970.x>
- 746 Romero, L.M., Reed, J.M., 2005. Collecting baseline corticosterone samples in the field: is  
747 under 3 min good enough? *Comp. Biochem. Physiol. A. Mol. Integr. Physiol.* 140,  
748 73–79. <https://doi.org/10.1016/j.cbpb.2004.11.004>
- 749 Scott, A.P., Hirschenhauser, K., Bender, N., Oliveira, R., Earley, R.L., Sebire, M., Ellis, T.,  
750 Pavlidis, M., Hubbard, P.C., Huertas, M., Canario, A., 2008. Non-Invasive  
751 Measurement of Steroids in Fish-Holding Water: Important Considerations When  
752 Applying the Procedure to Behaviour Studies. *Behaviour* 145, 1307–1328.
- 753 Still, M.B., Lea, A.M., Hofmann, H.A., Ryan, M.J., 2019. Multimodal stimuli regulate  
754 reproductive behavior and physiology in male túngara frogs. *Horm. Behav.* 115,  
755 104546. <https://doi.org/10.1016/j.yhbeh.2019.06.010>
- 756 Stücker, S., Ringler, M., Pašukonis, A., Weinlein, S., Hödl, W., Ringler, E., 2019. Spatio-  
757 Temporal Characteristics of the Prolonged Courtship in Brilliant-Thighed Poison  
758 Frogs, *Allobates femoralis*. *Herpetologica* 75, 268–279.  
759 <https://doi.org/10.1655/Herpetologica-D-19-00010.1>
- 760 Solís, R., Penna, M., 1997. Testosterone levels and evoked vocal responses in a natural  
761 population of the frog *Batrachyla taeniata*. *Hormon. Behav.* 31, 101-109. [https://doi-](https://doi-org.uaccess.univie.ac.at/10.1006/hbeh.1997.1366)  
762 [org.uaccess.univie.ac.at/10.1006/hbeh.1997.1366](https://doi-org.uaccess.univie.ac.at/10.1006/hbeh.1997.1366)
- 763 Sonnleitner, R., Ringler, M., Loretto, M. C., Ringler, E., 2020. Experience shapes accuracy in  
764 territorial decision-making in a poison frog. *Biol. Lett.* 16, 20200094.
- 765 Toft, C.A., 1980. Feeding ecology of thirteen syntopic species of anurans in a seasonal  
766 tropical environment. *Oecologia* 45, 131–141. <https://doi.org/10.1007/BF00346717>

- 767 Toledo, L.F., Martins, I.A., Bruschi, D.P., Passos, M.A., Alexandre, C., Haddad, C.F.B.,  
768 2014. The anuran calling repertoire in the light of social context. *Acta Ethologica* 18,  
769 87–99. <https://doi.org/10.1007/s10211-014-0194-4>
- 770 Tumulty, J.P., Pašukonis, A., Ringler, M., Forester, J.D., Hödl, W., Bee, M.A., 2018.  
771 Brilliant-thighed poison frogs do not use acoustic identity information to treat  
772 territorial neighbours as dear enemies. *Anim. Behav.* 141, 203–220.  
773 <https://doi.org/10.1016/j.anbehav.2018.05.008>
- 774 Ursprung, E., Ringler, M., Hödl, W., 2009. Phonotactic approach pattern in the neotropical  
775 frog *Allobates femoralis*: A spatial and temporal analysis. *Behav* 146, 153–170.  
776 <https://doi.org/10.1163/156853909X410711>
- 777 Ursprung, E., Ringler, M., Jehle, R., Hödl, W., 2011. Strong male/male competition allows  
778 for nonchoosy females: high levels of polygynandry in a territorial frog with paternal  
779 care: polygynandry in *A. femoralis*. *Mol. Ecol.* 20, 1759–1771.  
780 <https://doi.org/10.1111/j.1365-294X.2011.05056.x>
- 781 Wada, M., 1986. Circadian rhythms of testosterone-dependent behaviors, crowing and  
782 locomotor activity, in male Japanese quail. *J. Comp. Physiol. A* 158, 17–25.  
783 <https://doi.org/10.1007/BF00614516>
- 784 Wetzel, D. M., and Kelley, D. B. (1983). Androgen and gonadotropin effects on male mate  
785 calls in South African clawed frogs, *Xenopus laevis*. *Horm. Behav.* 17, 388–404.
- 786 Wingfield, J.C., 2005. A continuing saga: The role of testosterone in aggression. *Hormon.*  
787 *Behav.* 48, 253–255. <https://doi.org/10.1016/j.yhbeh.2005.05.009>
- 788 Wingfield, J.C., Hegner, R.E., Dufty, A.M., Ball, G.F., 1990. The “Challenge Hypothesis”:  
789 Theoretical Implications for Patterns of Testosterone Secretion, Mating Systems, and  
790 Breeding Strategies. *Am. Nat.* 136, 829–846.



- 791 Wingfield, J.C., Moore, I.T., Goymann, W., Wacker, D.W., Sperry, T., 2006. Contexts and  
792 ethology of vertebrate aggression: implications for the evolution of hormone–  
793 behavior interactions, in: Nelson, R.J. (Ed.), *Biology of Aggression*. Oxford  
794 University Press, New York, pp. 179–210.
- 795 Wingfield, JohnC., Wada, M., 1989. Changes in plasma levels of testosterone during male-  
796 male interactions in the song sparrow, *Melospiza melodia*: time course and specificity  
797 of response. *J Comp Physiol A* 166. <https://doi.org/10.1007/BF00193463>
- 798 Yanagida, T., 2020. misty: Miscellaneous Functions “T. Yanagida.”
- 799 Yao, M., Denver, R.J., 2007. Regulation of vertebrate corticotropin-releasing factor genes.  
800 *General and Comparative Endocrinology* 153, 200–216.  
801 <https://doi.org/10.1016/j.ygcen.2007.01.046>
- 802 Yao, M., Hu, F., Denver, R.J., 2008. Distribution and corticosteroid regulation of  
803 glucocorticoid receptor in the brain of *Xenopus laevis*. *J. Comp. Neurol.* 508, 967–  
804 982. <https://doi.org/10.1002/cne.21716>
- 805 Zeileis, A., Hothorn, T., 2002. Diagnostic Checking in Regression Relationships. *Cran R*  
806 *Proj.* 5.
- 807
- 808
- 809
- 810
- 811
- 812
- 813
- 814
- 815

816 **Figures and tables**

817

818 **Table 1.** Principal Component Analysis showing the loadings matrix of the behavioural

819 variables in principal components with eigen values greater than 1.

| <b>Variable</b>                         | <b>Principal components</b> |             |             |
|-----------------------------------------|-----------------------------|-------------|-------------|
|                                         | <b>PC1</b>                  | <b>PC2</b>  | <b>PC3</b>  |
| Advertisement call duration (sec)       | <b>0.97</b>                 | 0.09        | 0.03        |
| “warm-up” call duration (sec)           | <b>0.97</b>                 | -0.11       | 0.04        |
| Courtship call duration (sec)           | -0.01                       | <b>0.75</b> | -0.20       |
| # of feeding events                     | 0.06                        | -0.28       | <b>0.86</b> |
| # of HBO                                | 0.01                        | <b>0.45</b> | <b>0.77</b> |
| # of jumps                              | 0                           | <b>0.78</b> | 0.19        |
| <b>Proportion of explained variance</b> | 0.39                        | 0.31        | 0.30        |
| <b>Eigenvalues</b>                      | 1.91                        | 1.55        | 1.30        |

820

821

822

823 **Table 2.** Principal Component Analysis showing the loadings matrix of three variables

824 related to responsiveness latencies.

| <b>Variable</b>                                            | <b>Principal components</b> |             |            |
|------------------------------------------------------------|-----------------------------|-------------|------------|
|                                                            | <b>PC1</b>                  | <b>PC2</b>  | <b>PC3</b> |
| Latency to the 1 <sup>st</sup> head-body orientation (sec) | <b>0.99</b>                 | -0.01       | -0.16      |
| Latency to the 1 <sup>st</sup> jump (sec)                  | <b>0.99</b>                 | 0           | 0.17       |
| Latency to the perimeter (sec)                             | <b>0.48</b>                 | <b>0.88</b> | 0          |
| <b>Proportion of explained variance</b>                    | <b>0.72</b>                 | 0.26        | 0.02       |
| <b>Eigenvalues</b>                                         | <b>2.28</b>                 | 0.66        | 0.05       |

825

826

827

828

829

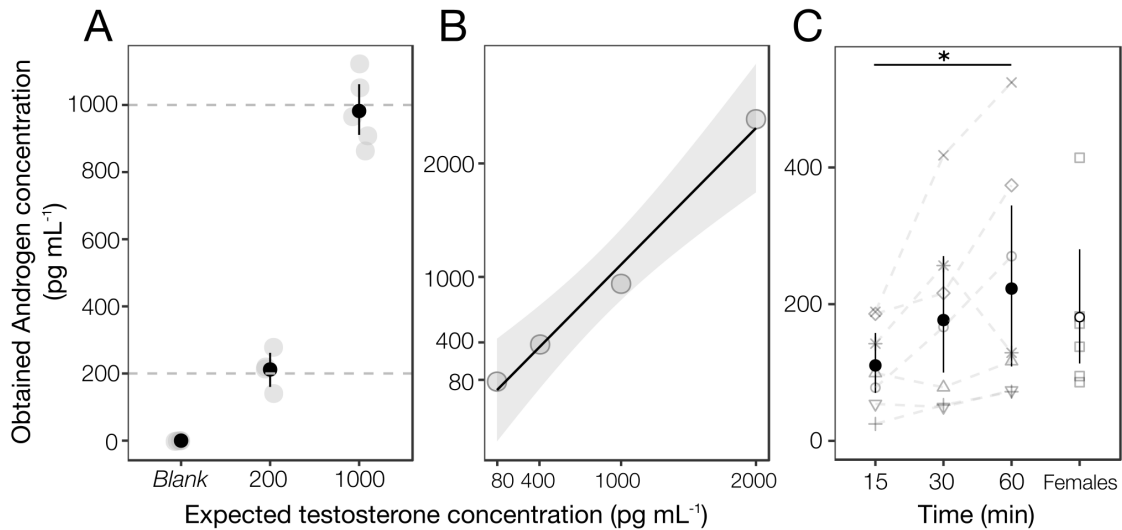

830

831 **Figure 1.** Validation of the extraction method for water-borne androgen. **(A)** Recovery  
832 percentages of testosterone standards of 0 (Blank), 200 and 1000 pg mL<sup>-1</sup>; **(B)** Correlation  
833 between expected and obtained testosterone concentrations in 2 mL aliquots; **(C)** Release  
834 rates of water-borne androgen in 60-min, 30-min and 15-min. Release rates are also shown  
835 for females in 60-min water baths. Solid black-points and bars represent the mean and 95%  
836 confidence intervals, respectively. \*P<0.05

837

838

839

840

841

842

843

844

845

846

847

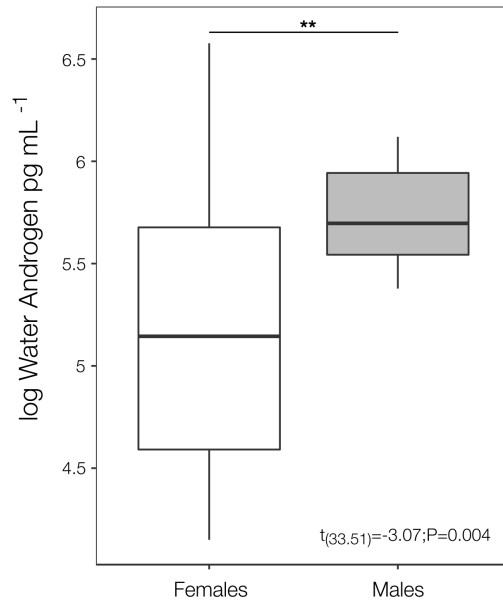

848

849 **Figure 2.** Comparison between males and females in water-borne androgen concentration.

850 Both, males and females were placed in individual water baths for 60 min. \*\*P<0.01

851

852

853

854

855

856

857

858

859

860

861

862

863

864

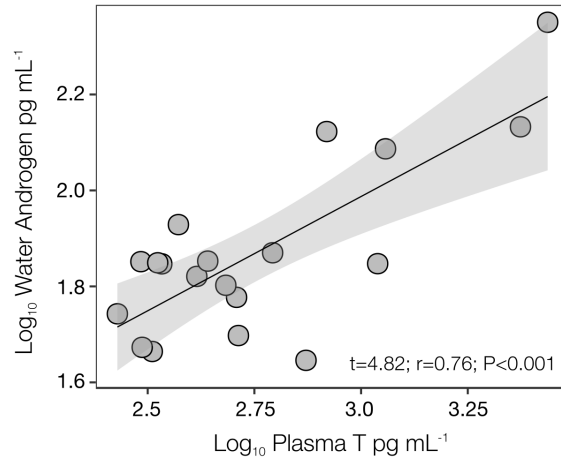

865

866 **Figure 3.** Parametric correlation (Pearson) between plasma testosterone and water-borne

867 androgen concentrations. Shaded grey region represents 95% confidence intervals.

868

869

870

871

872

873

874

875

876

877

878

879

880

881

882

883

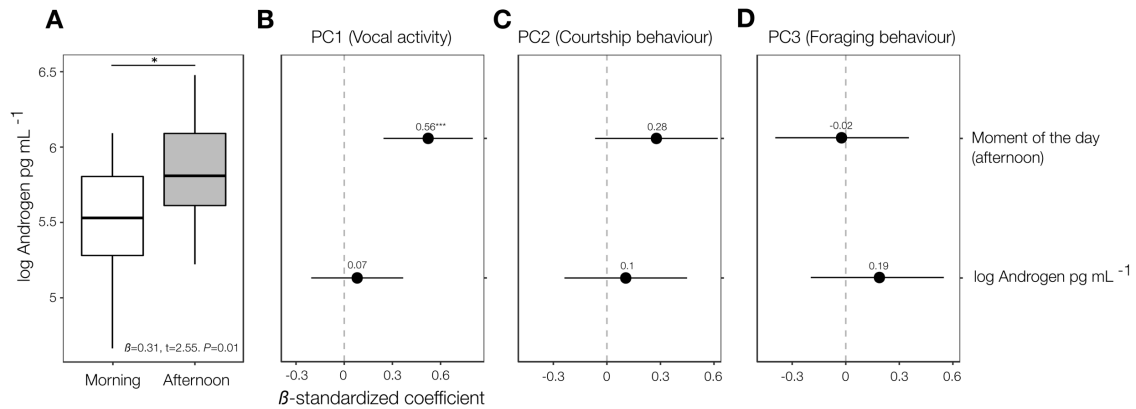

884

885 **Figure 4.** Water-borne androgen levels, vocal, courtship and foraging behaviour across the

886 day. (A) Boxplot showing the difference of water-borne androgen concentration between

887 morning and afternoon; Linear Mixed Model plots showing z-scores values (x-axis) and the

888 effect size (numbers over mean-points) of time of the day and androgens over vocal activity

889 (B), courtship behaviour (C) and foraging behaviour (D). Solid lines represent 95%

890 confidence intervals. \* $P < 0.05$ , \*\* $P < 0.001$ .

891

892

893

894

895

896

897

898

899

900

901

902

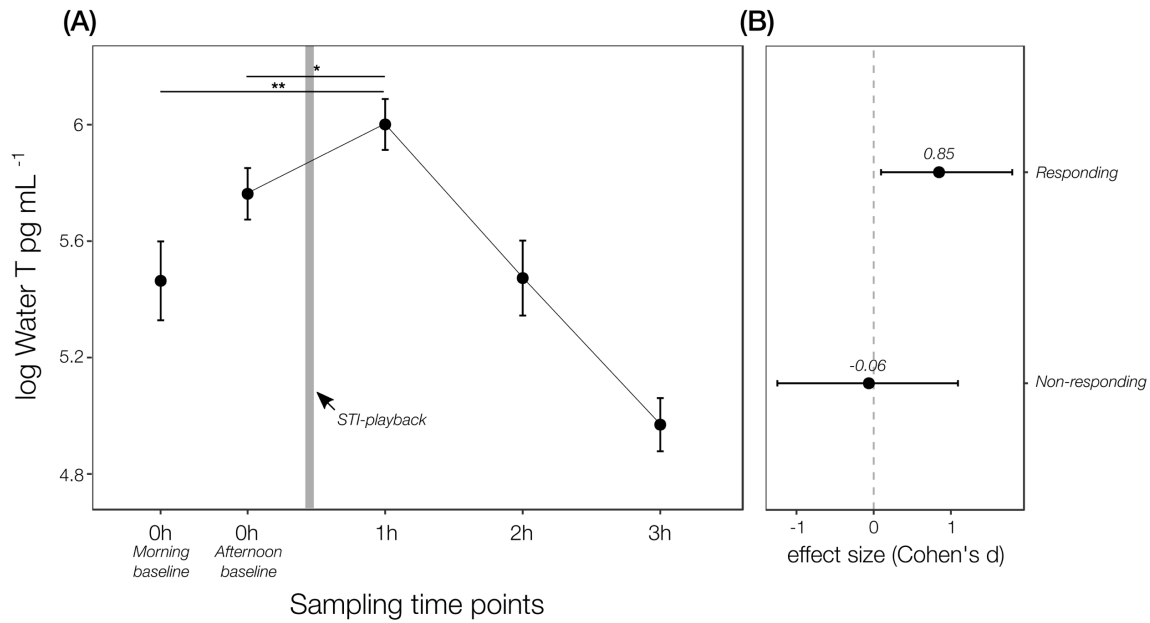

903

904 **Figure 5.** Androgen responsiveness after STI in *A. femoralis* males. **(A)** Comparison of  
905 baselines of water-borne androgen concentration (morning/afternoon; pre-STI) between  
906 concentrations over three sampling times (1h, 2h and 3h; post-STI). \*P<0.05, \*\*P<0.001. **(B)**  
907 Differences in effect size ( $\pm 95\%$  confidence intervals for both variables) of the male-male  
908 androgen responsiveness ( $dR_{\text{male-male}}$ ) between responding (N=16) and non-responding (N=6)  
909 males.

910

911

912

913

914

915

916

917

918

919
